# Supplementary material
Source: PubMed Central journal article supplement (PMC6640421)
Supplement: MPP-9-511-s002.pdf [file MPP-9-511-s002.pdf]

| Position     | 974* | 1017 | 1128 | 1200 | 1395 | 1482 | 1542 | 1560 | 1770 | 1816 | 1824 | 1893 | 1899 |
|--------------|------|------|------|------|------|------|------|------|------|------|------|------|------|
| Ppat5Ahnd1   | -    | -    | T    | C    | A    | -    | -    | C    | -    | T    | -    | T    | T    |
| Ppat5Hind2   | -    | -    | -    | -    | -    | -    | -    | -    | T    | -    | T    | -    | -    |
| Ppat5Aswa1   | C    | -    | -    | -    | -    | -    | -    | -    | -    | -    | -    | -    | -    |
| Ppat5Emco5   | -    | -    | -    | -    | -    | -    | -    | -    | -    | -    | -    | -    | -    |
| Ppat5Hiks1   | -    | A    | -    | -    | -    | -    | -    | -    | -    | -    | T    | -    | -    |
| Ppat5Goco1   | -    | A    | -    | -    | -    | -    | -    | -    | -    | -    | T    | -    | -    |
| Ppat5Waco5   | -    | A    | -    | -    | -    | -    | -    | -    | -    | -    | T    | -    | -    |
| Ppat5Hind4   | -    | -    | T    | -    | A    | -    | -    | C    | -    | T    | -    | T    | T    |
| Ppat5Cala2   | -    | -    | T    | -    | A    | -    | -    | C    | -    | T    | -    | T    | T    |
| Ppat5Emoy2   | -    | A    | -    | -    | -    | -    | -    | -    | -    | -    | T    | -    | -    |
| Ppat5Noks1   | -    | -    | T    | -    | A    | -    | A    | C    | -    | T    | -    | T    | T    |
| Ppat5Wela3   | -    | -    | -    | -    | -    | -    | -    | -    | -    | -    | -    | -    | -    |
| Ppat5Bico1   | -    | -    | -    | -    | A    | -    | -    | C    | -    | T    | -    | T    | -    |
| Ppat5Emwa1-A | -    | A    | T    | -    | -    | T    | -    | C    | -    | T    | -    | -    | T    |
| Ppat5Emwa1-B | -    | -    | T    | -    | A    | -    | -    | -    | -    | T    | T    | T    | -    |
| Ppat5Maks9   | -    | -    | -    | -    | -    | -    | -    | -    | -    | -    | T    | -    | -    |
| Consensus    | G    | G    | C    | T    | G    | C    | G    | T    | C    | C    | C    | C    | C    |

Supplemental Table 1. *Ppat5* polymorphisms in 15 isolates of *H. parastitica* (Ppat5Cand5 was not analysed). - symbolises no nucleotide change, the allele has the nucleotide of the consensus sequence in this position. \* indicates a replacement change, all other polymorphisms are silent.
