# Supplementary material
Source: PubMed Central journal article supplement (PMC6640421)
Supplement: MPP-9-511-s003.pdf [file MPP-9-511-s003.pdf]

| Mutated Leucine Heptad Repeat |                                                                               | Recognition by RPP13-Nd |
|-------------------------------|-------------------------------------------------------------------------------|-------------------------|
| ATR13-Maks9                   | L-X <sub>6</sub> -L-X <sub>6</sub> -L-X <sub>6</sub> -I-X <sub>6</sub> -I     | Full                    |
| L50>G                         | G-X <sub>6</sub> -L-X <sub>6</sub> -L-X <sub>6</sub> -I-X <sub>6</sub> -I     | Full                    |
| L57>G                         | L-X <sub>6</sub> -G-X <sub>6</sub> -L-X <sub>6</sub> -I-X <sub>6</sub> -I     | Full                    |
| L64>G                         | L-X <sub>6</sub> -L-X <sub>6</sub> -G-X <sub>6</sub> -I-X <sub>6</sub> -I     | None                    |
| I71>G                         | L-X <sub>6</sub> -L-X <sub>6</sub> -L-X <sub>6</sub> -G-X <sub>6</sub> -I     | Full                    |
| I78>G                         | L-X <sub>6</sub> -L-X <sub>6</sub> -L-X <sub>6</sub> -I-X <sub>6</sub> -G     | Intermediate            |
| L64>P                         | L-X <sub>6</sub> -L-X <sub>6</sub> -P-X <sub>6</sub> -I-X <sub>6</sub> -I     | None                    |
| L64>A                         | L-X <sub>6</sub> -L-X <sub>6</sub> -A-X <sub>6</sub> -I-X <sub>6</sub> -I     | None                    |
| K66>G                         | L-X <sub>6</sub> -L-X <sub>6</sub> -L-X-G-X <sub>4</sub> -I-X <sub>6</sub> -I | Full                    |

Supplemental Table 2. Sequence of the leucine heptad repeat of ATR13-Maks9 and the mutant constructs and their recognition responses to RPP13-Nd in the biolistic assay.
