# Supplementary material
Source: PubMed Central journal article supplement (PMC6640421)
Supplement: MPP-9-511-s004.pdf [file MPP-9-511-s004.pdf]

|                |                                                             |
|----------------|-------------------------------------------------------------|
| ATR13-7F       | 5'-AAAAAGCAGGCTCAATGCGCCTTGTTACGCGGTAC-3'                   |
| ATR13-7R       | 5'-AGAAAGCTGGGTAGGTACACAACACTACTGTCTGTC-3'                  |
| ATR13-8R       | 5'-AGAAAGCTGGGTAGGTACACAACACTACTGACTGGC-3'                  |
| ATR13-11F      | 5'-<br>AAAAAGCAGGCTGCACCACCATGGTCTCCAACGGGAATCTGCTCC-<br>3' |
| ATR13-11R      | 5'-AGAAAGCTGGGTACTACTGTCTGTCAAGGGCAGCCCCGAAG-3'             |
| ATR13-12R      | 5'-AGAAAGCTGGGTACTACTGACTGGCAACGGCAGTCTGAAG-3'              |
| ATR13-13R      | 5'-AGAAAGCTGGGTAGGTTCACAACTTCTTCCTTTC-3'                    |
| ATR13-14R      | 5'-AGAAAGCTGGGTACTACTGACTGGCAAGGGCAGTCCGAAG-3'              |
| 35SHells1F     | 5'-GGAGCTCTCCCATATCGACCTGCAG-3'                             |
| 35SHells1R     | 5'-CGAGCGTGTCTCTCCAAATGAAAT-3'                              |
| 35SHells1Fgate | 5'-AAAAAGCAGGCTGGAGCTCTCCCATATCGACCT-3'                     |
| 35SHells1Rgate | 5'-AGAAAGCTGGGTTCGAGCGTGTCTCTCCAATG-3'                      |

Supplemental Table 3. Sequences of primers used in this work.
